# Supplementary material for: Quantifying the phase separation property of chromatin-associated proteins under physiological conditions using an anti-1,6-hexanediol index
Source: PubMed Central journal article supplement (PMC8369651; doi:10.1186/s13059-021-02456-2), 2021-08-17
Supplement: 13059_2021_2456_MOESM4_ESM.pdf [file 13059_2021_2456_MOESM4_ESM.pdf]

TableS3 Quality control of BL-Hi-C experiments

| Condition | replicate      | total PETs | Valid PETs | Unique_paired_alignments | Valid_interaction_pairs | valid_interaction_rmdup | trans_interaction | cis_interaction | cis/trans |
|-----------|----------------|------------|------------|--------------------------|-------------------------|-------------------------|-------------------|-----------------|-----------|
| 1,6-HD(-) | rep1-1         | 29438000   | 25331673   | 16935472                 | 11557498                | -                       | -                 | -               | -         |
|           | rep2-1         | 33252468   | 28509616   | 18677317                 | 13467020                | -                       | -                 | -               | -         |
|           | rep3-1         | 45893846   | 39778132   | 26418191                 | 19407786                | -                       | -                 | -               | -         |
|           | rep1-2         | 749122163  | 644608079  | 428365449                | 290268716               | -                       | -                 | -               | -         |
|           | rep2-2         | 755428345  | 647842397  | 421512295                | 301757571               | -                       | -                 | -               | -         |
|           | rep3-2         | 776025450  | 672469129  | 444162683                | 324363301               | -                       | -                 | -               | -         |
|           | <b>Summary</b> | 2389160272 | 2058539026 | 1356071407               | 960821892               | 649465091               | 111696727         | 537768364       | 4.81      |
| 1,6-HD(+) | rep1-1         | 41589365   | 35909324   | 22788602                 | 18977150                | -                       | -                 | -               | -         |
|           | rep2-1         | 38072170   | 31992728   | 20027819                 | 16345180                | -                       | -                 | -               | -         |
|           | rep3-1         | 29154137   | 24401207   | 14952963                 | 11759364                | -                       | -                 | -               | -         |
|           | rep1-2         | 747180413  | 645103059  | 405872089                | 335937700               | -                       | -                 | -               | -         |
|           | rep2-2         | 666975425  | 558536859  | 343261747                | 276368714               | -                       | -                 | -               | -         |
|           | rep3-2         | 586417942  | 489337783  | 295982287                | 229752090               | -                       | -                 | -               | -         |
|           | <b>Summary</b> | 2109389452 | 1785280960 | 1102885507               | 889140198               | 647066749               | 148821974         | 498244775       | 3.35      |
